# Supplementary material for: Schmerzpsychologische Interventionen bei onkologischen Patienten
Source: Springer Nature journal article supplement (doi:10.1007/s00482-016-0169-7), 2016-11-10
Supplement: MOESM2 [file 11039522]

**Tab. 4. Liste der 32 eingeschlossenen Publikationen**

1. Anderson KO, Mendoza TR, Payne R et al (2004) Pain education for underserved minority cancer patients: a randomized controlled trial. J Clin Oncol 22:4918–4925

2. Butler LD, Koopman C, Neri E et al (2009) Effects of supportive-expressive group therapy on pain in women with metastatic breast cancer. Health Psychol 28:579–587

3. Carmack Taylor CL, Demoor C, Smith MA et al (2006) Active For Life After Cancer: a randomized trial examining a lifestyle physical activity program for prostate cancer patients. Psychooncology 862:847–862

4. Changrani J, Lieberman M, Golant M et al (2008) Online cancer support groups: experiences with underserved immigrant Latinas. Prim Psychiatry 15:55–62

5. Dalton JA, Keefe FJ, Carlson J, Youngblood R (2004) Original articles tailoring cognitive- behavioral treatment for cancer pain. Pain Manag Nurs 5:3–18

6. Domar AD, Noe JM, Benson H (1987) The preoperative use of the relaxation response with ambulatory surgery patients. J Human Stress 3: 101–107

7. Domar AD, Eyvazzadeh A, Allen S et al (2005) Relaxation techniques for reducing pain and anxiety during screening. AJR 184:445–447

8. Gaston-Johansson F, Fall-Dickson JM, Nanda J et al (2000) The effectiveness of the comprehensive coping strategy program on clinical outcomes in breast cancer autologous bone marrow transplantation. Cancer Nurs 23:277–285

9. Given B, Given CW, McCorkle R et al (2002) Pain and fatigue managment: results of a nursing randomized clinical trial. Oncol Nurs Forum 29:949–956

10. Goodwin PJ, Lesczcz M, Ennis M et al (2001) The effect of group psychosocial support on survival in metastatic breast cancer. N Engl J Med 345:1719–1726

11. Helgeson VS, Cohen S, Schulz R, Yasko J (2001) Long-term effects of educational and peer discussion group interventions on adjustment to breast cancer. Health Psychol 20:387–392

12. Jahn P, Kuss O, Schmidt H et al (2014) Improvement of pain-related self-management for cancer patients through a modular transitional nursing intervention: A cluster-randomized multicenter trial. Pain 155:746–754

13. Keefe FJ, Ahles TA, Sutton L et al (2005) Partner-guided cancer pain management at the end of life: a preliminary study. J Pain Symptom Manage 29:263–272

14. Kravitz RL, Tancredi DJ, Grennan T et al (2011) Cancer health empowerment for living without pain (Ca-HELP): effects of a tailored education and coaching intervention on pain and impairment. Pain 152:1572–1582

15. Kwekkeboom KL, Abbott-Anderson K, Cherwin C et al (2013) Pilot randomized controlled trial of a patient-controlled cognitive-behavioral intervention for the pain, fatigue, sleep disturbance symptom cluster in cancer. J Pain Symptom Manage 44:810–822

16. Lang EV, Berbaum KS, Faintuch S et al (2006) Adjunctive self-hypnotic relaxation for outpatient medical procedures : A prospective randomized trial with women undergoing large core breast biopsy. Pain 126:155–164

17. Lengacher CA, Johnson-Mallard V, Post-White J et al (2009) Randomized controlled trial of mindfulness-based stress reduction (MBSR) for survivors of breast cancer. Psychooncology 1272:1261–1272

18. McMillan SC, Small BJ (2007) Using the COPE intervention for family caregivers to improve symptoms of hospice homecare patients: a clinical trial. Oncol Nurs Forum 34:313–321

19. van der Meulen IC, May AM, de Leeuw JR et al (2014) Long-term effect of a nurse-led psychosocial intervention on health-related quality of life in patients with head and neck cancer: a randomised controlled trial. Br J Cancer 110:593–601

20. Miaskowski C, Dodd M, West C et al (2004) Randomized clinical trial of the effectiveness of a self-care intervention to improve cancer pain management. J Clin Oncol 22:1713–1720

21. Montgomery GH, Bovbjerg DH, Schnur JB et al (2007) A randomized clinical trial of a brief hypnosis intervemtion to control side effects in breast surgery patients. J Natl Cancer Inst 99:1304–1312

22. Porter LS, Keefe FJ, Garst J et al (2012) Caregiver-assisted coping skills training for lung cancer: results of a randomized clinical trial. J Pain Symptom Manage 41:1-13

23. Smith MY, Duhamel KN, Egert J, Winkel G (2010) Patient education and counseling impact of a brief intervention on patient communication and barriers to pain management: results from a randomized controlled trial. Patient Educ Couns 81:79–86

24. Snow A, Dorfman D, Warbet R et al (2012) A randomized trial of hypnosis for relief of pain and anxiety in adult cancer patients undergoing bone marrow procedures. J Psychosoc Oncol 30:281–293

25. Spiegel D, Bloom JR (1983) Group therapy and hypnosis reduce metastatic breast carcinoma pain. Psychosom Med 45:333–339

26. Syrjala KL, Abrams JR, Polissar NL et al (2008) Patient training in cancer pain management using integrated print and video materials: a multisite randomized controlled trial. Pain 135:175–186

27. Syrjala KL, Donaldson GW, Davis MW et al (1995) Relaxation and imagery and cognitive-behavioral training reduce pain during cancer treatment: a controlled clinical trial. Pain 63:189–198

28. Thomas ML, Elliott JE, Rao SM et al (2012) A randomized, clinical trial of education or motivational-interviewing-based coaching compared to usual care to improve cancer pain management. Oncol Nurs Forum 39:39–49

29. Wang Y, Huang H, Zeng Y et al (2013) Pharmacist-led medication education in cancer pain control: a multicentre randomized controlled study in Guangzhou, China. J Int Med Res 41:1462–1472

30. Ward S, Donovan H, Gunnarsdottir S et al (2008) A randomized trial of a representational intervention to decrease cancer pain (RIDcancerPain). Health Psychol 27:59–67

31. de Wit R, van Dam F, Zandbelt L et al (1997) A pain education program for chronic cancer pain patients: follow-up results from a randomized controlled trial. Pain 73:55–69

32. Yates P, Edwards H, Nash R et al (2004) A randomized controlled trial of a nurse-administered educational intervention for improving cancer pain management in ambulatory settings. Patient Educ Couns 53:227–237
